# Supplementary material
Source: PubMed Central journal article supplement (PMC546019)

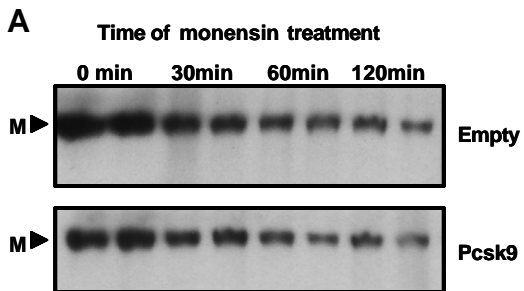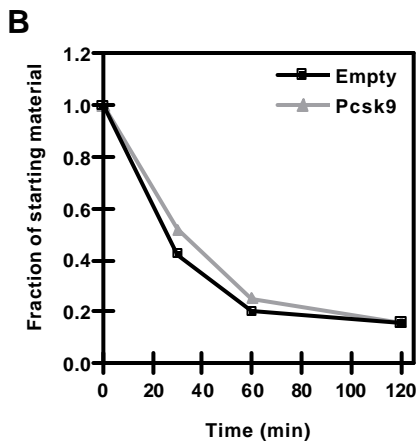

Supplement: pnas_102_6_2069__1.pdf [file pnas_102_6_2069__1.pdf]
